# Supplementary material
Source: Springer Nature journal article supplement (https://www.springermedizin.de/resource/supplementary/12885_2009_2044_MOESM6_ESM.pdf/9460386)

**A**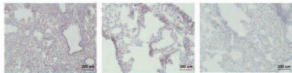

Saline

LV-GFP

LV-Kallistatin

**B**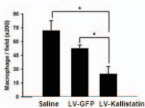**C**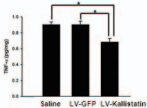**D**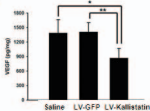**E**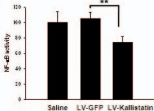

Supplement: MOESM6 [file 9460386]
